# Supplementary material for: Real-World Data of Adherence and Drug Survival of Biologics in Treatment-Naïve and Treatment-experienced Adult Patients with Rheumatoid Arthritis
Source: Springer Nature journal article supplement (doi:10.1007/s12325-023-02607-w), 2023-08-11
Supplement: MOESM1 [file 25913324]

# **Real-World Data of Adherence and Drug Survival of Biologics in Treatment-naïve and Treatment-experienced Adult Rheumatoid Arthritis Patients**

## **Supplementary Material**

**Running title:** Adherence and drug survival of advance therapies in RA: Real-world study

Vered Rosenberg<sup>1</sup>

Gabriel Chodick<sup>1,2</sup>

Zhenyi Xue<sup>3</sup>

Freddy Faccin<sup>3</sup>

Howard Amital<sup>2,4</sup>

<sup>1</sup>Maccabi Institute for Research and Innovation, Maccabi Healthcare Services, Tel Aviv, Israel

<sup>2</sup>Sackler Faculty of Medicine, Tel Aviv University, Tel Aviv, Israel

<sup>3</sup>AbbVie Inc., North Chicago, IL, United States

<sup>4</sup>Department of Medicine 'B' & Zabludowicz Center of Autoimmune Diseases, Sheba Medical Center, Tel-Hashomer, Israel

**Corresponding Author:** Professor Howard Amital, Department of Medicine 'B' & Zabludowicz Center of Autoimmune Diseases, Sheba Medical Center, Tel Hashomer, Ramat Gan 52621, Israel. Email: [Howard.Amital@sheba.health.gov.il](mailto:Howard.Amital@sheba.health.gov.il)

**ORCID iDs:**

Vered Rosenberg: 0000-0002-1535-7091

Gabriel Chodick: 0000-0002-5189-8995

Freddy Faccin: 0000-0002-3535-7152

Howard Amital: 0000-0002-5406-7716

**Table S1. Mode of administration and dosing schedule by drug**

|              | <b>Mode of administration</b> | <b>Injection administration mode</b> | <b>Dosing schedule</b> |
|--------------|-------------------------------|--------------------------------------|------------------------|
| Golimumab    | Injection                     | SC                                   | Every 4-11 weeks       |
| Adalimumab   |                               |                                      | Every 1-2 weeks        |
| Etanercept   |                               |                                      |                        |
| Certolizumab |                               |                                      |                        |
| Sarilumab    |                               |                                      |                        |
| Tocilizumab  |                               |                                      | SC/IV                  |
| Abatacept    |                               | Every 4-11 weeks (IV)                |                        |
| Infliximab   |                               | IV                                   | Every 4-11 weeks       |
| Rituximab    |                               |                                      | Every $\geq$ 12 weeks  |
| Tofacitinib  | Oral                          | NA                                   | Daily                  |

IV, intravenous; SC, subcutaneous
